# Supplementary material for: Combined Endovascular and Surgical Treatment of Chronic Carotid Artery Occlusion: Hybrid Operation
Source: Hindawi journal article supplement (doi:10.1155/2020/6622502), 2020-01-01
Supplement: f1 [file 6622502.f1.pdf]

|    | Sex | Age | Hypertension | Diabetes | Hyperlipidemia | Smoking | Drinking | Duration |
|----|-----|-----|--------------|----------|----------------|---------|----------|----------|
| 1  | M   | 50  | Y            | Y        | Y              | Y       | N        | 50       |
| 2  | M   | 59  | Y            | N        | Y              | N       | N        | 21       |
| 3  | M   | 56  | Y            | Y        | N              | Y       | Y        | 45       |
| 4  | M   | 60  | N            | Y        | N              | Y       | Y        | 60       |
| 5  | M   | 69  | N            | N        | Y              | Y       | Y        | 7        |
| 6  | M   | 62  | Y            | N        | Y              | Y       | N        | 120      |
| 7  | M   | 47  | Y            | Y        | N              | Y       | Y        | 17       |
| 8  | M   | 57  | N            | N        | N              | Y       | Y        | 30       |
| 9  | M   | 62  | N            | Y        | N              | Y       | Y        | 30       |
| 10 | M   | 67  | Y            | Y        | Y              | Y       | N        | 15       |
| 11 | M   | 61  | Y            | Y        | Y              | Y       | Y        | 30       |
| 12 | M   | 77  | Y            | N        | N              | N       | N        | 60       |
| 13 | M   | 71  | Y            | Y        | Y              | Y       | Y        | 10       |
| 14 | M   | 67  | Y            | N        | N              | Y       | N        | 30       |
| 15 | M   | 62  | Y            | Y        | N              | Y       | Y        | 90       |
| 16 | F   | 73  | Y            | Y        | Y              | N       | N        | 30       |
| 17 | M   | 66  | Y            | Y        | Y              | Y       | Y        | 7        |
| 18 | M   | 50  | N            | Y        | Y              | Y       | N        | 90       |
| 19 | M   | 52  | N            | Y        | Y              | N       | N        | 30       |
| 20 | M   | 66  | N            | N        | Y              | Y       | Y        | 15       |
| 21 | M   | 65  | N            | N        | N              | Y       | Y        | 13       |
| 22 | M   | 64  | Y            | N        | Y              | Y       | N        | 240      |
| 23 | M   | 65  | Y            | N        | N              | Y       | N        | 15       |
| 24 | M   | 59  | N            | Y        | Y              | Y       | N        | 5        |
| 25 | M   | 61  | N            | N        | N              | N       | N        | 15       |
| 26 | M   | 62  | Y            | N        | Y              | Y       | Y        | 14       |
| 27 | F   | 64  | Y            | N        | Y              | Y       | N        | 120      |
| 28 | M   | 70  | N            | Y        | N              | Y       | N        | 14       |
| 29 | F   | 60  | N            | Y        | Y              | Y       | N        | 14       |
| 30 | F   | 60  | Y            | N        | N              | N       | N        | 15       |
| 31 | M   | 65  | Y            | Y        | N              | Y       | Y        | 15       |
| 32 | M   | 65  | Y            | Y        | N              | N       | N        | 30       |
| 33 | M   | 58  | Y            | N        | N              | Y       | Y        | 120      |
| 34 | M   | 63  | Y            | N        | Y              | N       | N        | 15       |
| 35 | M   | 69  | N            | Y        | Y              | N       | Y        | 10       |
| 36 | M   | 56  | Y            | N        | N              | N       | N        | 30       |
| 37 | M   | 58  | Y            | Y        | N              | N       | N        | 45       |

| Left/Right | Stump condition   | Blood reflux | Distal ICA reconstruction  | Occlusion site |
|------------|-------------------|--------------|----------------------------|----------------|
| L          | Blunt or no stump | N            | Clinoid segment and beyond | ICA            |
| L          | Blunt or no stump | Y            | Below clinoid segment      | CCA            |
| L          | Tapered           | N            | Below clinoid segment      | ICA            |
| R          | Tapered           | N            | Clinoid segment and beyond | Others         |
| L          | Tapered           | Y            | Below clinoid segment      | ICA            |
| R          | Blunt or no stump | Y            | Clinoid segment and beyond | ICA            |
| L          | Tapered           | Y            | Below clinoid segment      | ICA            |
| R          | Tapered           | N            | Clinoid segment and beyond | Others         |
| L          | Blunt or no stump | Y            | Below clinoid segment      | ICA            |
| R          | Blunt or no stump | Y            | Below clinoid segment      | ICA            |
| R          | Tapered           | N            | Clinoid segment and beyond | ICA            |
| L          | Blunt or no stump | Y            | Below clinoid segment      | CCA            |
| R          | Blunt or no stump | Y            | Below clinoid segment      | ICA            |
| R          | Tapered           | N            | Clinoid segment and beyond | ICA            |
| L          | Tapered           | N            | Clinoid segment and beyond | ICA            |
| L          | Tapered           | Y            | Below clinoid segment      | CCA            |
| L          | Tapered           | N            | Below clinoid segment      | ICA            |
| L          | Blunt or no stump | N            | Clinoid segment and beyond | ICA            |
| R          | Tapered           | N            | Clinoid segment and beyond | Others         |
| R          | Tapered           | Y            | Below clinoid segment      | ICA            |
| R          | Blunt or no stump | N            | Clinoid segment and beyond | ICA            |
| R          | Blunt or no stump | N            | Clinoid segment and beyond | ICA            |
| L          | Blunt or no stump | Y            | Below clinoid segment      | ICA            |
| L          | Blunt or no stump | Y            | Below clinoid segment      | ICA            |
| R          | Tapered           | N            | Clinoid segment and beyond | ICA            |
| L          | Tapered           | Y            | Below clinoid segment      | ICA            |
| L          | Tapered           | Y            | Below clinoid segment      | ICA            |
| L          | Tapered           | Y            | Below clinoid segment      | ICA            |
| R          | Blunt or no stump | Y            | Below clinoid segment      | ICA            |
| R          | Blunt or no stump | Y            | Below clinoid segment      | CCA            |
| R          | Tapered           | N            | Clinoid segment and beyond | Others         |
| R          | Blunt or no stump | N            | Clinoid segment and beyond | ICA            |
| L          | Blunt or no stump | Y            | Below clinoid segment      | ICA            |
| R          | Blunt or no stump | N            | Below clinoid segment      | ICA            |
| L          | Tapered           | Y            | Below clinoid segment      | ICA            |
| R          | Tapered           | N            | Clinoid segment and beyond | Others         |
| R          | Tapered           | N            | Clinoid segment and beyond | ICA            |

| Success | Preoperative I/C | Postoperative I/C | Preoperative NHISS | Postoperative NHISS |
|---------|------------------|-------------------|--------------------|---------------------|
| Y       | 1.56             | 1.21              | 6                  | 2                   |
| Y       | 1.37             | 1.03              | 5                  | 1                   |
| Y       | 1.28             | 1.05              | 5                  | 3                   |
| N       | 1.41             | 1.25              | 8                  | 6                   |
| Y       | 1.78             | 1.15              | 10                 | 5                   |
| Y       | 1.44             | 1.22              | 8                  | 4                   |
| Y       | 1.76             | 1.32              | 5                  | 2                   |
| N       | 1.45             | 1.38              | 5                  | 4                   |
| Y       | 1.22             | 1.08              | 6                  | 4                   |
| Y       | 1.11             | 1.02              | 3                  | 2                   |
| Y       | 1.32             | 1.01              | 2                  | 0                   |
| Y       | 1.23             | 1.06              | 6                  | 3                   |
| Y       | 1.48             | 1.08              | 4                  | 1                   |
| Y       | 1.37             | 1.09              | 3                  | 1                   |
| Y       | 1.06             | 1                 | 4                  | 1                   |
| Y       | 1.1              | 1                 | 2                  | 0                   |
| Y       | 1.16             | 1.02              | 4                  | 1                   |
| N       | 1.35             | 1.28              | 5                  | 4                   |
| N       | 1.58             | Dead              | 9                  | Dead                |
| Y       | 1.49             | Dead              | 6                  | Dead                |
| Y       | 1.69             | 1.27              | 3                  | 0                   |
| N       | 1.85             | 2.82              | 3                  | 2                   |
| Y       | 1.41             | 1.1               | 3                  | 0                   |
| Y       | 1.14             | 1.01              | 8                  | 2                   |
| Y       | 1.39             | 1.05              | 6                  | 2                   |
| Y       | 1.46             | 1.13              | 9                  | 3                   |
| N       | 1.53             | 1.5               | 5                  | 3                   |
| Y       | 1.5              | 1.21              | 7                  | 4                   |
| Y       | 1.98             | 1.23              | 10                 | 4                   |
| Y       | 1.41             | 1.12              | 2                  | 0                   |
| Y       | 1.51             | 1.11              | 4                  | 3                   |
| N       | 1.21             | 1.13              | 4                  | 2                   |
| Y       | 2.36             | 1.51              | 5                  | 2                   |
| Y       | 1.26             | 1.08              | 6                  | 2                   |
| Y       | 1.53             | 1.14              | 6                  | 2                   |
| Y       | 1.57             | 1.16              | 7                  | 3                   |
| Y       | 1.46             | 1.08              | 6                  | 2                   |
